# Supplementary material for: Microwave-Assisted Fabrication of Mesoporous Silica-Calcium Phosphate Composites for Dental Application
Source: MDPI journal article supplement (doi:10.3390/polym13010053), 2020-12-25
Supplement: s1 [file s1]

Supplementary

# Microwave-assisted fabrication of mesoporous silica-calcium phosphate composites for dental application

Adrian Szewczyk <sup>1</sup>, Adrianna Skwira <sup>1</sup>, Marta Ginter <sup>1,2</sup>, Donata Tajer <sup>1,2</sup> and Magdalena Prokopowicz <sup>1,\*</sup>

<sup>1</sup> Department of Physical Chemistry, Faculty of Pharmacy, Medical University of Gdańsk, Hallera 107, 80-416 Gdańsk, Poland

<sup>2</sup> Scientific Circle of Students

\* Correspondence: magdalena.prokopowicz@gumed.edu.pl

## Supplementary Information

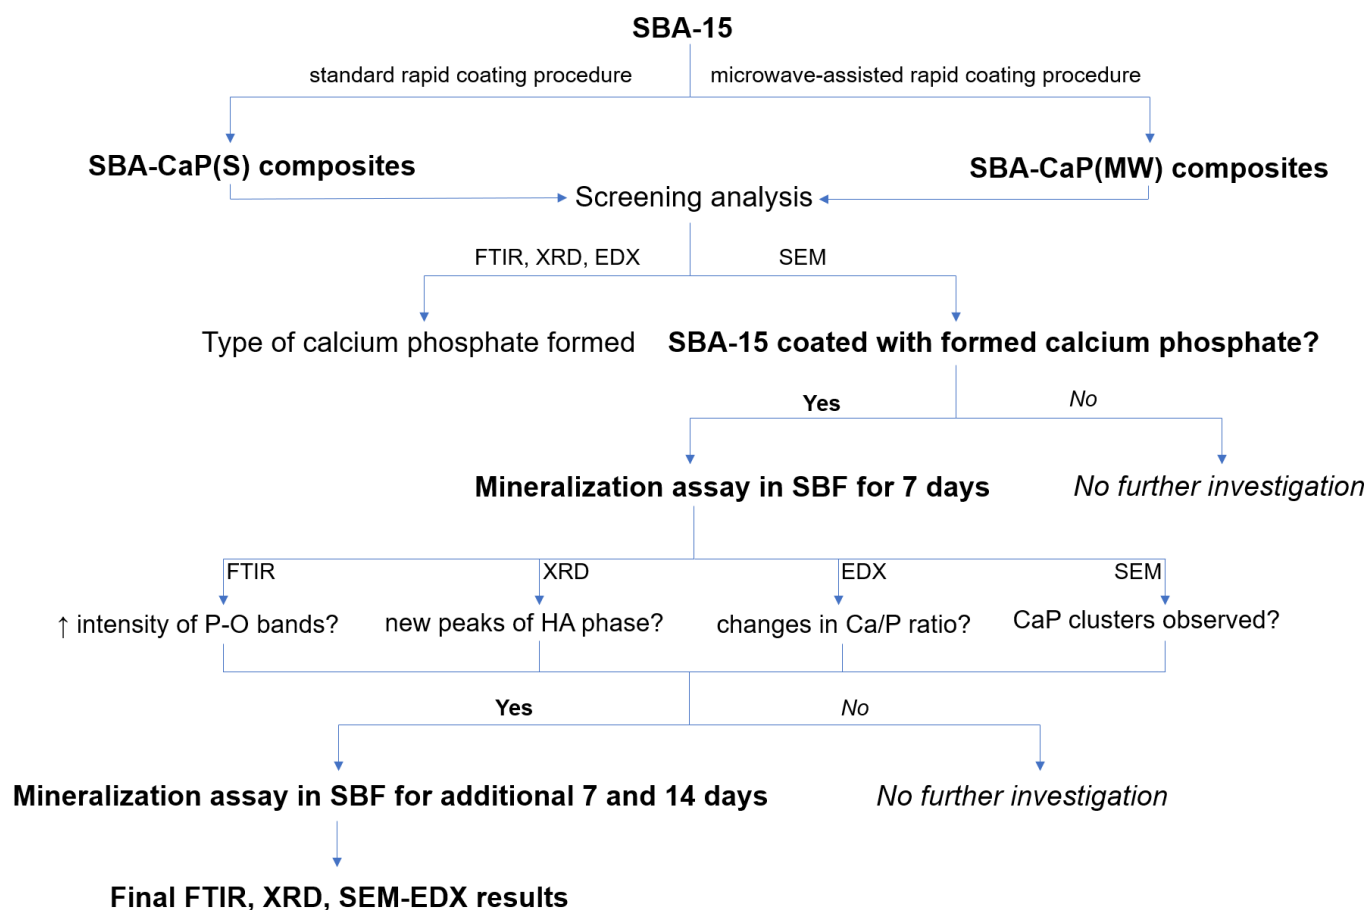

**Figure S1.** The flowchart of the study design: SBA-15-calcium phosphate composites synthesis and mineralization properties investigation.

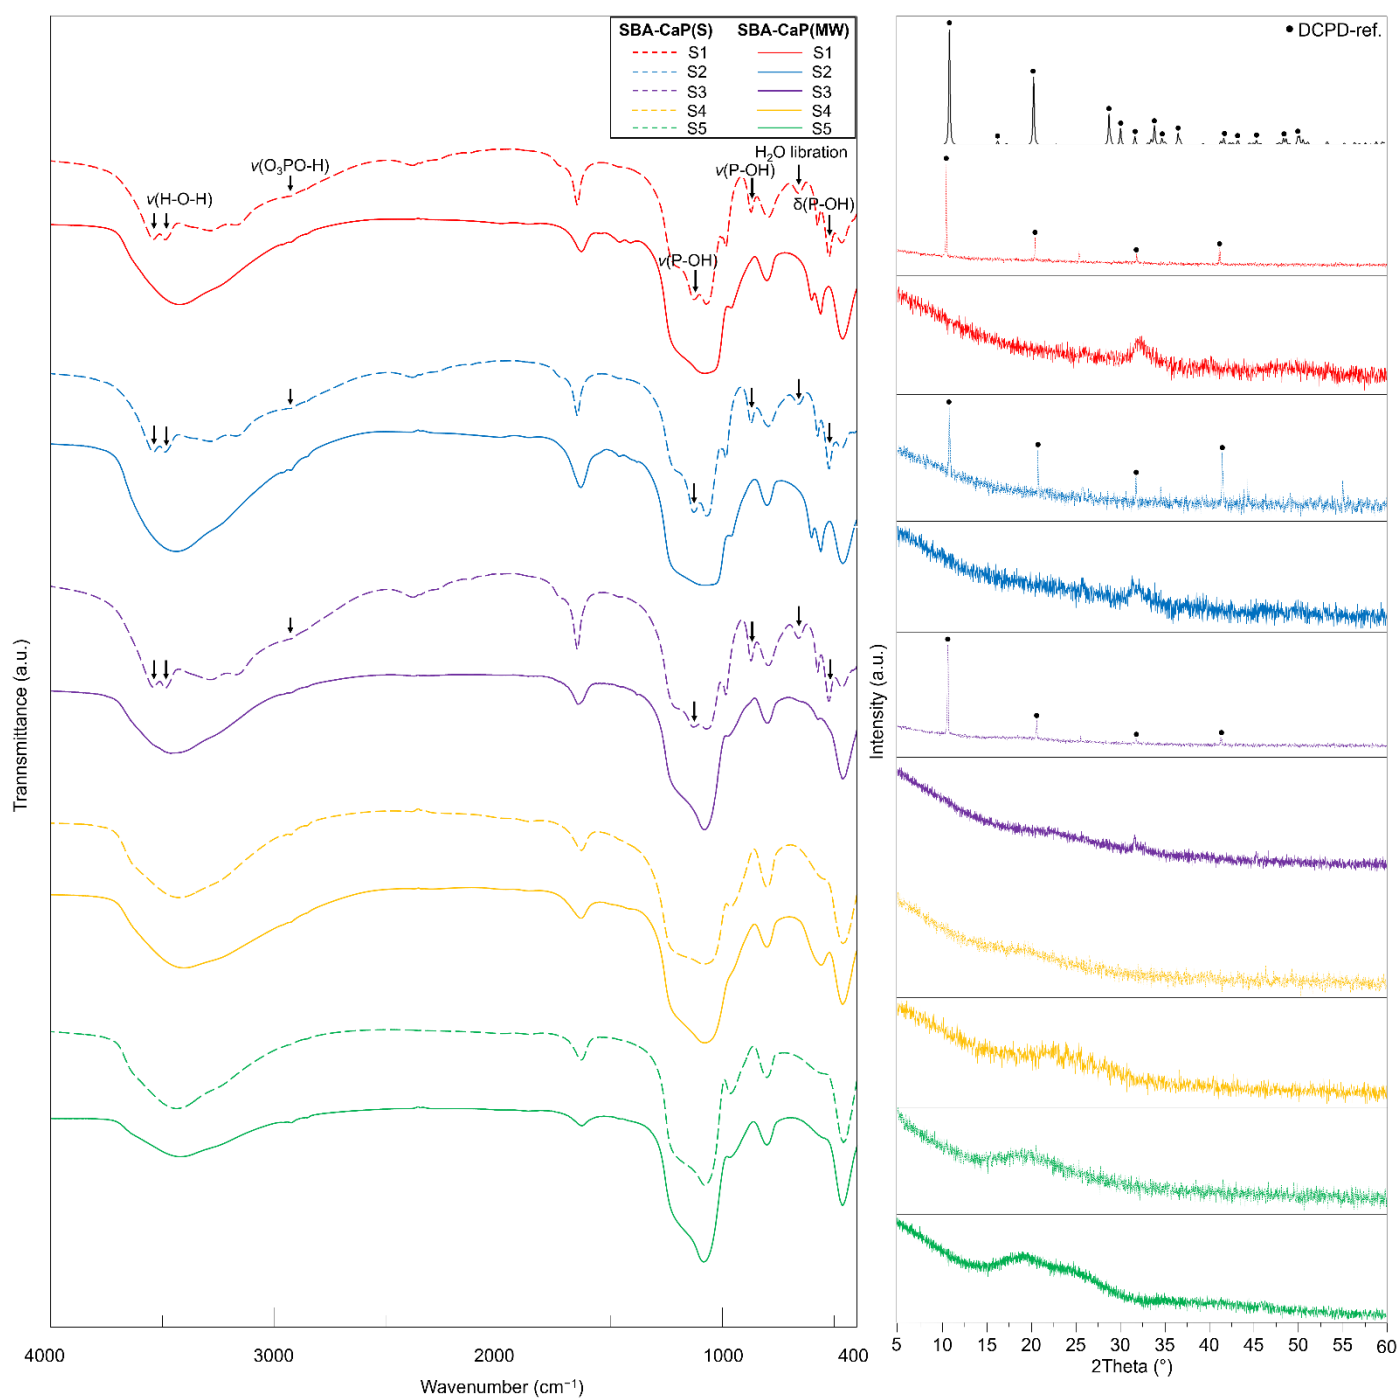

**Figure S2.** FTIR (left) and XRD (right) results of obtained SBA-CaP composites using standard (dashes) and microwave-assisted (straight lines) rapid coating procedures (types of vibration:  $\nu$ —stretching,  $\delta$ —bending). Arrows correspond to the vibrational modes characteristic for dicalcium phosphate dihydrate (DCPD).

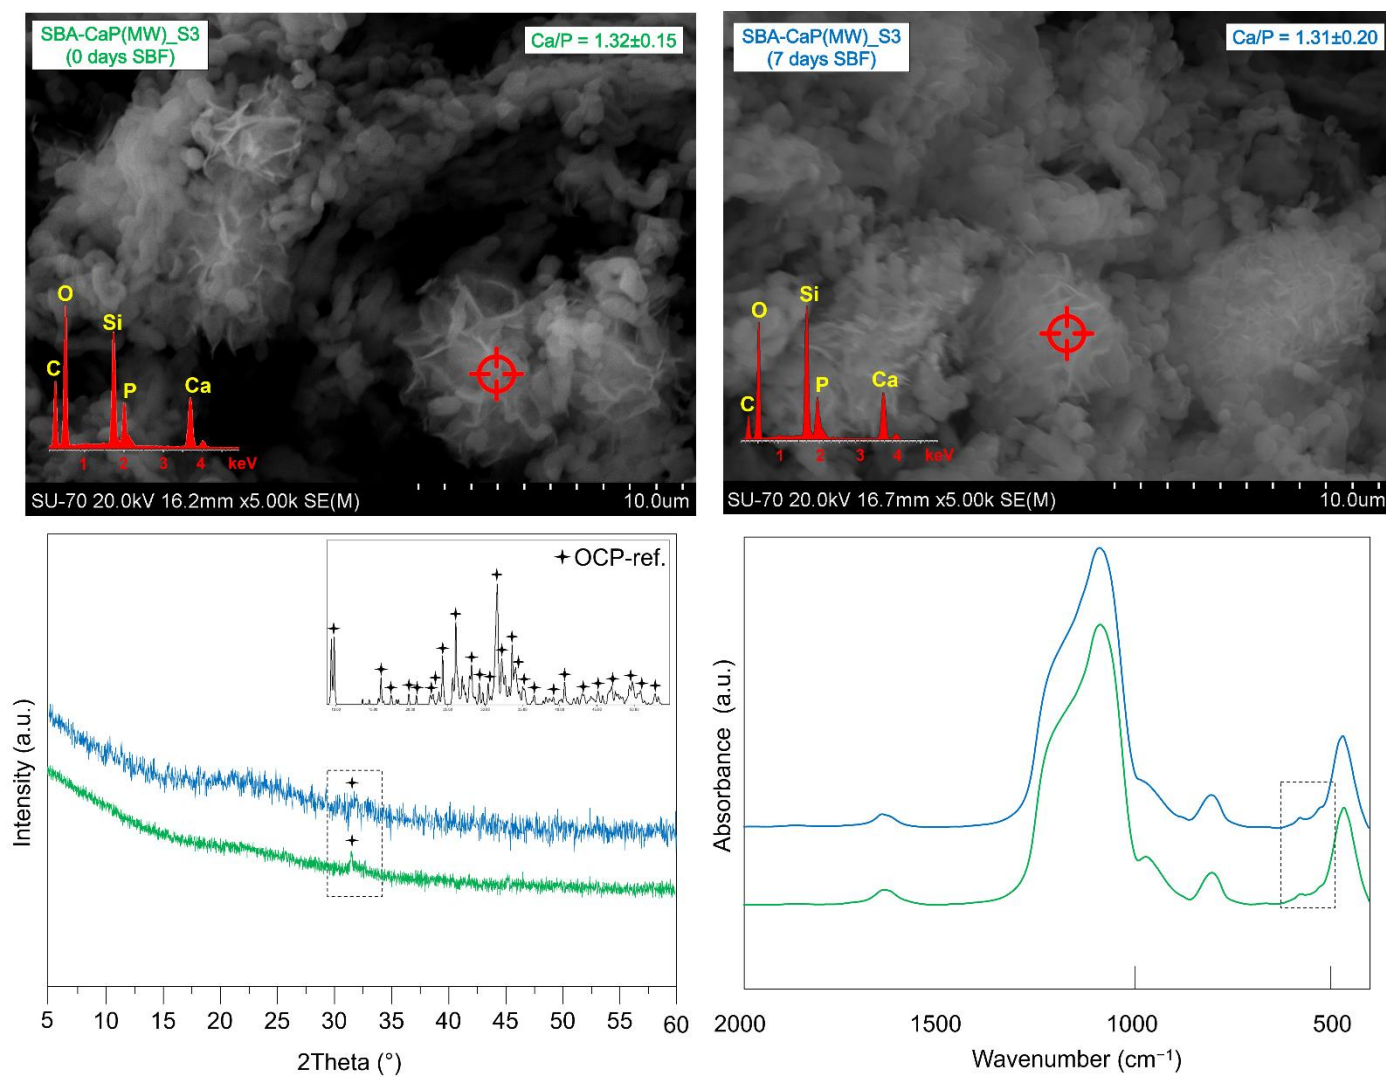

**Figure S3.** SEM-EDX, FTIR, and XRD results of SBA-CaP(MW)\_S3 composite before (green) and after (blue) 7 days of incubation in simulated body fluid with marked areas confirming the poor mineralization potential of obtained composite.
